# Supplementary material for: A novel synthesis method for nitrogen-rich energetic frameworks containing bistetrazoles: assembling an advanced high-energy density material with high nitrogen content and good oxygen balance
Source: Royal Society of Chemistry journal article supplement (doi:10.1039/d4ta05721j), 2024-01-01
Supplement: d4ta05721j1.pdf [file d4ta05721j1.pdf]

## *Journal of Materials Chemistry A*

Supporting Information (SI)

**A novel synthesis method for nitrogen-rich energetic  
frameworks containing bistetrazoles: assembling an advanced  
high-energy density material with high nitrogen content and  
good oxygen balance**

*Xuezhi Yu<sup>a</sup>, Jie Tang<sup>a</sup>, Caijin Lei<sup>a</sup>, Chungui Xue<sup>a</sup>, Hongwei Yang<sup>\*a</sup>, Chuan Xiao<sup>\*a</sup>,  
and Guangbin Cheng<sup>\*a</sup>*

- a. School of Chemical Engineering, Nanjing University of Science and Technology, Xiaolingwei 200, Nanjing, Jiangsu, China. E-mail: [hyang@mail.njust.edu.cn](mailto:hyang@mail.njust.edu.cn); [gcheng@mail.njust.edu.cn](mailto:gcheng@mail.njust.edu.cn).
- b. China Northern Industries Group Co., Ltd. (NORINCO GROUP), Beijing 100089, P. R. China. E-mail: [47785121@qq.com](mailto:47785121@qq.com).

# Content

|                                                                                                                                              |    |
|----------------------------------------------------------------------------------------------------------------------------------------------|----|
| 1. Experimental .....                                                                                                                        | 3  |
| 2. General Methods .....                                                                                                                     | 7  |
| 3. References .....                                                                                                                          | 27 |
| 4. $^1\text{H}$ & $^{13}\text{C}$ NMR Spectra of <b>Na<sub>2</sub>TT</b> , <b>H<sub>2</sub>TT</b> , <b>BDNTT</b> and compound <b>1</b> ..... | 29 |

# 1. Experimental

## 1.1 Safety precautions

Warning! All new compounds involved are potential explosives with a risk of explosion. Avoid mechanical impacts and electrostatic friction during experiments. The use of full protective equipment by laboratory staff is strongly recommended.

## 1.2 Synthesis of sodium [5,2':5',5''-terttriazole]-1,1''-diide ( $\text{Na}_2\text{TT}$ )

1.38 g (10.0 mmol) of  $\text{H}_2\text{BT}$  was dissolved in an aqueous NaOH solution (0.80 g of NaOH in 20 ml of  $\text{H}_2\text{O}$ ). Subsequently, 100 ml of freshly prepared  $\text{NCN}_3$  was added, and the reaction was conducted at 10 °C for 24 hours. After the reaction was completed, the mixture was filtered and washed with acetonitrile, resulting in a white powder weighing 1.82 g, achieving a yield of 72.8%.  $^{13}\text{C}$  NMR (75 MHz,  $\text{DMSO-d}_6$ ):  $\delta$  = 157.71, 154.40, 152.15 ppm. IR (KBr,  $\text{v/cm}^{-1}$ ):  $\nu$  = 1428, 1386, 1384, 1351, 1334, 1320, 1304, 1205, 1186, 1174, 961, 918, 666  $\text{cm}^{-1}$ ; Elemental analysis calcd (%) for  $\text{C}_3\text{N}_{12}\text{Na}_2$  (250.02): C: 14.41, N: 67.21 %; Found (%): C: 14.82, N: 67.53 %.

Synthesis of freshly prepared  $\text{NCN}_3$ : 3.18 g (30.0 mmol) of  $\text{BrCN}$  was dissolved in 100 ml of acetonitrile and cooled to 0 °C. Then,  $\text{NaN}_3$  (7.80 g, 120.0 mmol) was added and the reaction was carried out at 0 °C for 6 hours. The filtrate was filtered to remove insoluble inorganic salts, and the filtrate was stored at low temperature to obtain the freshly prepared  $\text{NCN}_3$ .

## 1.3 Synthesis of 1H,1''H-5,2':5',5''-terttriazole ( $\text{H}_2\text{TT}$ )

1.00 g (4 mmol) of  $\text{Na}_2\text{TT}$  was dissolved in deionized water and stirred at room temperature. 37 % concentrated hydrochloric acid was added drop by drop until

reaching a pH of 2~3. The mixture was then filtered, washed with ice water, resulting in 0.75 g of white powder with an 91% yield.  $^{13}\text{C}$  NMR (75 MHz, DMSO- $d_6$ ):  $\delta = 155.53, 155.07, 154.75$  ppm. IR (KBr,  $\nu/\text{cm}^{-1}$ ):  $\nu = 1559, 1438, 1417, 1290, 1223, 1154, 1125, 1092, 1078, 1038, 1012, 985, 706, 682$   $\text{cm}^{-1}$ ; Elemental analysis calcd (%) for  $\text{C}_3\text{H}_2\text{N}_{12}$  (206.13): C: 17.48, H: 0.98, N: 81.54 %; Found (%): C: 17.13, H: 1.06, N: 81.81 %.

#### 1.4 Synthesis of magnesium [5,2':5',5''-tertetrazole]-1,1''-diide (MgTT)

1.00 g (4.9 mmol) of  $\text{H}_2\text{TT}$  and 0.69 g of  $\text{Mg}_2(\text{OH})_2\text{CO}_3$  were put into deionised water and stirred at room temperature. The mixture was heated to reflux for 6 h. At the end of the reaction, the mixture was filtered and washed with ice water to give 0.88 g of white powder in 79% yield.  $^{13}\text{C}$  NMR (75 MHz, DMSO- $d_6$ ):  $\delta = 159.90, 157.97, 152.16$  ppm. IR (KBr,  $\nu/\text{cm}^{-1}$ ):  $\nu = 1469, 1423, 1341, 1322, 1274, 1239, 1202, 1176, 1131, 1064, 973, 876, 649$   $\text{cm}^{-1}$ ; Elemental analysis calcd (%) for  $\text{C}_3\text{MgN}_{12}$  (228.42): C: 15.77, N: 73.58 %; Found (%): C: 16.02, N: 73.94 %.

#### 1.5 Synthesis of 1,1'-(2H,2''H-[5,2':5',5''-tertetrazole]-2,2''-diyl) bis(propan-2-one) (1)

$\text{Na}_2\text{TT}$  (1.00 g, 4.0 mmol) was dissolved in 50 ml of water. Then 2 ml (23.8 mmol) of acetone bromide was added and the reaction was carried out at 70 °C for 18 hours. The reaction mixture was filtered, followed by sequential washings with water and acetone. The obtained solid was then dried to yield a white powder weighing 1.12 g, resulting in a yield of 88%.  $^1\text{H}$  NMR (300 MHz, DMSO- $d_6$ ):  $\delta = 6.22$  (s, 2H), 6.12 (s, 2H), 2.36 (s, 3H), 2.33(s, 3H) ppm.  $^{13}\text{C}$  NMR (75 MHz, DMSO- $d_6$ ):  $\delta =$

199.92, 199.62, 158.37, 156.61, 155.67, 62.87, 62.19, 27.67 ppm. IR (KBr,  $\nu/\text{cm}^{-1}$ ):  $\nu = 1800, 1790, 1557, 1436, 1429, 1345, 1258, 1152, 1074, 1068, 1047, 991, 833, 677 \text{ cm}^{-1}$ ; Elemental analysis calcd (%) for  $\text{C}_9\text{H}_{10}\text{N}_{12}\text{O}_2$  (318.10): C: 33.97, H: 3.17, N: 52.81 %; Found (%): C: 34.13, H: 3.62, N: 51.48 %.

### 1.6 Synthesis of 2,2''-bis(dinitromethyl)-2H,2''H-5,2':5',5''-tertetrazole (BDNTT)

Compound **1** (0.50 g, 1.2 mmol) was dissolved in 3 ml of  $\text{H}_2\text{SO}_4$  at a temperature of  $-5^\circ\text{C}$ . Then, 3 ml of Fuming  $\text{HNO}_3$  was slowly added dropwise while maintaining the reaction temperature at  $-10^\circ\text{C}$  for a duration of 2 days. The reaction mixture was subsequently poured into ice water to quench the reaction. The resulting mixture was filtered, washed with water and dried, yielding a white powder weighing 0.47 g with a yield of 72%.  $^1\text{H}$  NMR (300 MHz,  $\text{DMSO-d}_6$ ):  $\delta = 9.26$  (s, 2H) ppm.  $^{13}\text{C}$  NMR (75 MHz,  $\text{DMSO-d}_6$ ):  $\delta = 158.58, 156.31, 155.50, 131.06$  ppm. IR (KBr,  $\nu/\text{cm}^{-1}$ ):  $\nu = 1695, 1687, 1673, 1438, 1260, 1252, 1249, 1233, 1144, 966, 938, 770 \text{ cm}^{-1}$ ; Elemental analysis calcd (%) for  $\text{C}_5\text{H}_2\text{N}_{16}\text{O}_8$  (414.02): C: 14.50, H: 0.49, N: 54.11 %; Found (%): C: 14.32, H: 0.39, N: 53.69 %.

### 1.7 Synthesis of sodium [5,5'-bitetrazole]-1,1'-diide ( $\text{Na}_2\text{BT}$ )

A solution was prepared by dissolving 1.98 g (10.0 mmol) of 2,3-dicyano-5,6-dichloropyrazine in 15 mL of DMF. Slowly, 2.64 g (40.0 mmol) of  $\text{NaN}_3$  was added to the solution, and the mixture was stirred at room temperature for 0.5 hours. The reaction mixture was then heated to  $95^\circ\text{C}$  and allowed to react for 6 hours. After cooling back to room temperature, the resulting solid was filtered to obtain light yellow powder weighing 0.88 g, with a yield of 48%. IR (KBr,  $\nu/\text{cm}^{-1}$ ):  $\nu = 734, 1015, 1049, 1148, 1182, 1308, 1345 \text{ cm}^{-1}$ .<sup>[1]</sup>

### 1.8 Synthesis of sodium 1H-[5,5'-bitetrazol]-2'-ide (NaHBT)

A solution was prepared by dissolving 1.98 g (10.0 mmol) of 2,3-dicyano-5,6-dichloropyrazine in 15 mL of acetone. Slowly, 2.64 g (40.0 mmol) of  $\text{NaN}_3$  was added to the solution. The temperature was then raised to 55 °C and the reaction proceeded for 6 hours. After cooling back to room temperature, the resulting mixture was filtered to obtain light yellow powder weighing 0.83 g, with a yield of 52%.  $^{13}\text{C}$  NMR (75 MHz,  $\text{D}_2\text{O}$ ):  $\delta = 149.76$  ppm. IR (KBr,  $\text{v}/\text{cm}^{-1}$ ):  $\nu = 3424, 1425, 1353, 1325, 1303, 1290, 1195, 1137, 1084, 709$   $\text{cm}^{-1}$ ; Elemental analysis calcd (%) for  $\text{C}_2\text{HN}_8\text{Na}$  (160.08): C: 15.01, H: 0.63, N: 70.00 %; Found (%): C: 14.92, H: 0.72, N: 69.69 %.

### 1.9 Synthesis of potassium [5,5'-bitetrazole]-1,1'-diide ( $\text{K}_2\text{BT}$ )

A solution was prepared by dissolving 1.98 g (10.0 mmol) of 2,3-dicyano-5,6-dichloropyrazine in 15 mL of DMF. Slowly, 3.20 g (40.0 mmol) of  $\text{KN}_3$  was added to the solution. The temperature was then raised to 95 °C and the reaction proceeded for 6 hours. After cooling back to room temperature, the resulting mixture was filtered to obtain a white solid weighing 1.18 g, with a yield of 52%. IR (KBr,  $\text{v}/\text{cm}^{-1}$ ):  $\nu = 732, 1009, 1042, 1140, 1170, 1302, 1334$   $\text{cm}^{-1}$ .<sup>[2]</sup>

### 1.10 Synthesis of 1H,1'H-5,5'-bitetrazole ( $\text{H}_2\text{BT}$ )

**Method 1:** 1.00 g (5.5 mmol) of  $\text{Na}_2\text{BT}$  was dissolved in deionized water and stirred. 37% concentrated hydrochloric acid was added drop by drop until reaching a pH of 2~3. The mixture was then filtered, washed with ice water, resulting in 0.65 g of white powder with an 86% yield.

**Method 2:** 1.00 g (5.5 mmol) of **Na<sub>2</sub>BT** was added to acetone and stirred. 37% concentrated hydrochloric acid was then added dropwise until reaching a pH of 2~3. The mixture was stirred for 0.5 hours, filtered and the filtrate was obtained as 0.7g of white powder after centrifugation under reduced pressure, with a yield of 91%. IR (KBr,  $\nu/\text{cm}^{-1}$ ): 3177, 3014, 2803, 2692, 2657, 2513, 1626, 1529, 1500, 685  $\text{cm}^{-1}$ .<sup>[24]</sup>

**H<sub>2</sub>BT** can be prepared equally well using **NaHBT** and **K<sub>2</sub>BT** and the procedure is the same as the two methods described above.

## 2. General Methods

### **<sup>1</sup>H and <sup>13</sup>C NMR spectra**

<sup>1</sup>H and <sup>13</sup>C NMR spectra were recorded on 300 MHz (Bruker AVANCE 300) clear magnetic resonance spectrometers operating at 300 and 75 MHz, respectively, by using either DMSO-*d*<sub>6</sub> as the solvent and locking solvent unless otherwise stated. Chemical shifts in <sup>1</sup>H and <sup>13</sup>C NMR spectra are reported relative to DMSO. DSC was performed at a heating rate of 10 °C min<sup>-1</sup> in closed Al containers with a nitrogen flow of 30 mL min<sup>-1</sup> on an STD-Q600 instrument. Infrared (IR) spectra were recorded on a Perkin-Elmer Spectrum BX FT-IR equipped with an ATR unit at 25 °C. Impact sensitivity, friction sensitivity and electrostatic discharge sensitivity of samples are measured by using the standard BAM methods.

### **X-ray Crystallography**

The crystal of **MgTT** and **BDNTT** were performed on a Bruker Smart Apex II diffractometer with graphite-monochromated Mo K $\alpha$  radiation ( $\lambda = 0.71073 \text{ \AA}$ ), respectively. Integration and scaling of intensity data were accomplished using the SAINT program<sup>2</sup>. The structures were solved by intrinsic using SHELXT2014 and refinement was carried out by a full-matrix least-squares technique using SHELXT2014. The hydrogen atoms were refined isotropically, and the heavy atoms

were refined anisotropically. N-H and O-H hydrogens were located from different electron density maps, and C-H hydrogens were placed in calculated positions and refined with a riding model. Data were corrected for the effects of absorption using SADABS4. Relevant crystal data and refinement results are summarized in **Table S1**. **BDNTT** appears to be stacking phenomenon is overlapping of molecules in two opposite directions. They are sterically equivalent and do not affect the validity of the connectivity. The details of the model are shown below. Fig. (a) is a plot of the smallest asymmetric unit and Fig. (b) is a plot after growth. The structure in Fig. (a) is half of that in Fig. (b).

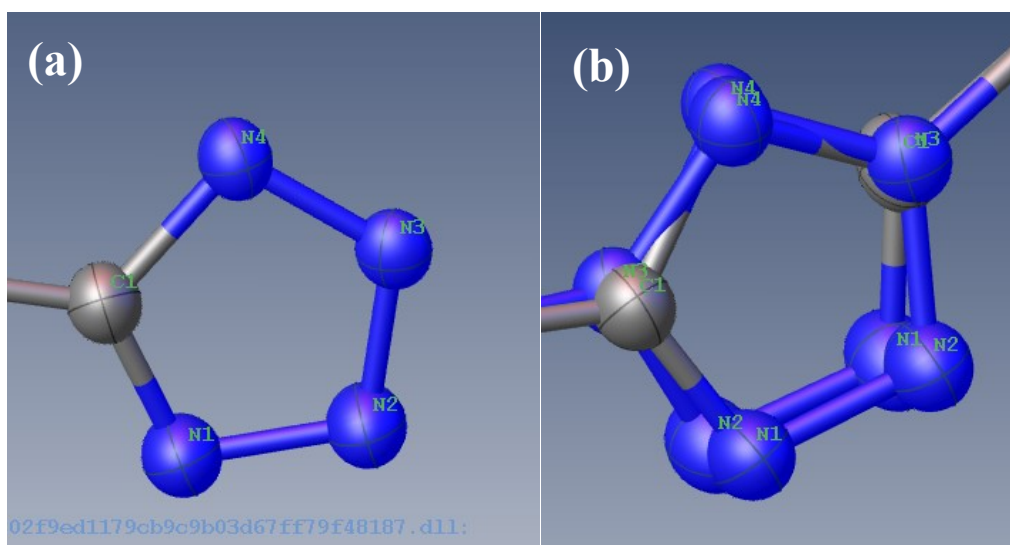



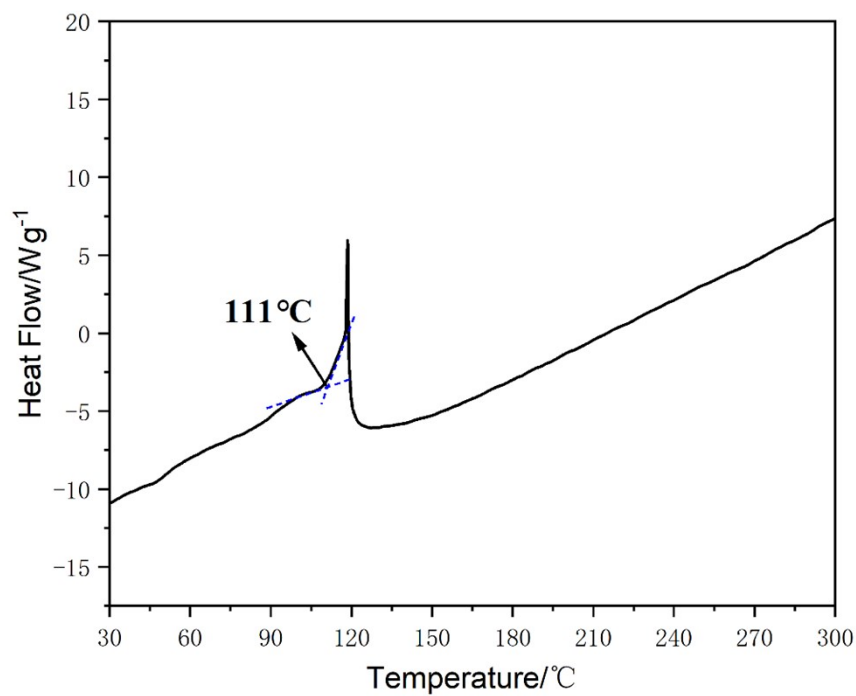

Figure S1 DSC plots of **BDNTT**

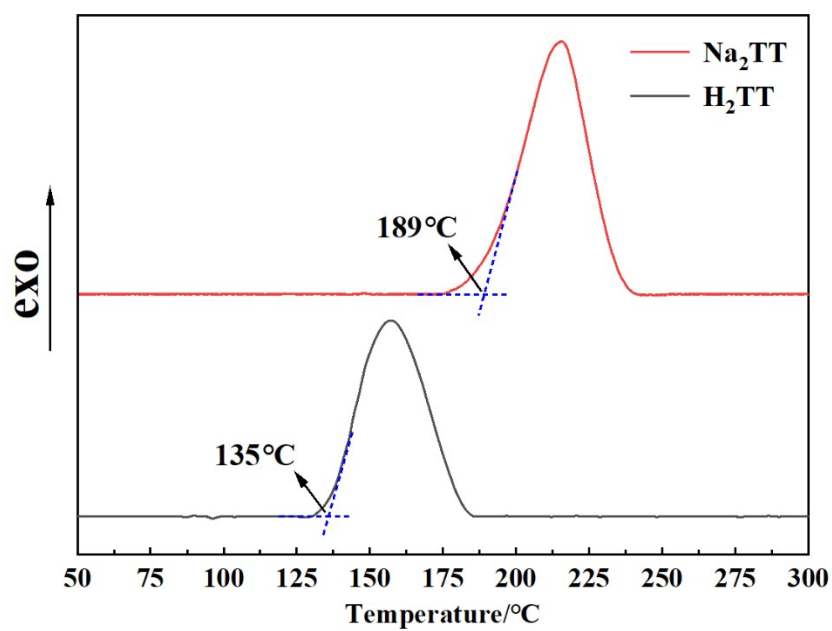

Figure S2 DSC plots of **Na<sub>2</sub>TT** and **H<sub>2</sub>TT**

**Table S1.** Crystal data and structure refinement for **Mg<sub>2</sub>TT·7H<sub>2</sub>O**, **BDNTT** (298K & 193K), **Na<sub>2</sub>BT·5H<sub>2</sub>O**, **K<sub>2</sub>BT**, **H<sub>2</sub>BT**.

| Crystal | Mg <sub>2</sub> TT·7 H <sub>2</sub> O | BDNTT (298K) |
|---------|---------------------------------------|--------------|
|---------|---------------------------------------|--------------|

|                                                     |                                                                                 |                                                                                 |
|-----------------------------------------------------|---------------------------------------------------------------------------------|---------------------------------------------------------------------------------|
| CCDC number                                         | 2349953                                                                         | 2336294                                                                         |
| Empirical formula                                   | C <sub>3</sub> H <sub>14</sub> MgN <sub>12</sub> O <sub>7</sub>                 | C <sub>5</sub> H <sub>2</sub> N <sub>16</sub> O <sub>8</sub>                    |
| Formula weight                                      | 354.57                                                                          | 414.23                                                                          |
| Temperature/K                                       | 223.00                                                                          | 298.00                                                                          |
| Crystal system                                      | triclinic                                                                       | monoclinic                                                                      |
| Space group                                         | P-1                                                                             | C2/c                                                                            |
| <i>a</i> [Å]                                        | 6.5363(3)                                                                       | 19.0737(14)                                                                     |
| <i>b</i> [Å]                                        | 9.9124(3)                                                                       | 8.8138(6)                                                                       |
| <i>c</i> [Å]                                        | 12.1756(4)                                                                      | 8.6876(5)                                                                       |
| $\alpha$ [°]                                        | 100.358(2)                                                                      | 90                                                                              |
| $\beta$ [°]                                         | 99.193(3)                                                                       | 90.350(3)                                                                       |
| $\gamma$ [°]                                        | 108.096(2)                                                                      | 90                                                                              |
| Volume                                              | 717.75(5)                                                                       | 1460.46(17)                                                                     |
| <i>Z</i>                                            | 2                                                                               | 4                                                                               |
| $\rho$ (g cm <sup>-3</sup> )                        | 1.641                                                                           | 1.884                                                                           |
| $\mu$ /mm <sup>-1</sup>                             | 1.698                                                                           | 0.173                                                                           |
| F(000)                                              | 368.0                                                                           | 832.0                                                                           |
| Crystal size (mm <sup>3</sup> )                     | 0.13 × 0.11 × 0.1                                                               | 0.13 × 0.11 × 0.1                                                               |
| Radiation                                           | CuK $\alpha$ ( $\lambda$ = 1.54178)                                             | MoK $\alpha$ ( $\lambda$ = 0.71073)                                             |
| Theta range for data collection                     | 7.586 to 136.732                                                                | 4.272 to 54.954                                                                 |
| Index ranges                                        | -7 ≤ <i>h</i> ≤ 7, -11 ≤ <i>k</i> ≤ 11,<br>-14 ≤ <i>l</i> ≤ 14                  | -24 ≤ <i>h</i> ≤ 24, -11 ≤ <i>k</i> ≤ 11,<br>-9 ≤ <i>l</i> ≤ 11                 |
| Reflections collected                               | 8869                                                                            | 8207                                                                            |
| Independent reflections                             | 2608 [ <i>R</i> <sub>int</sub> = 0.0453,<br><i>R</i> <sub>sigma</sub> = 0.0396] | 1679 [ <i>R</i> <sub>int</sub> = 0.0487,<br><i>R</i> <sub>sigma</sub> = 0.0327] |
| Data/restraints/<br>parameters                      | 2608/2/235                                                                      | 1679/69/145                                                                     |
| Goodness-of-fit on <i>F</i> <sup>2</sup>            | 1.026                                                                           | 1.075                                                                           |
| Final <i>R</i> indices [ <i>I</i> > 2σ( <i>I</i> )] | <i>R</i> <sub>1</sub> = 0.0533, <i>wR</i> <sub>2</sub> = 0.1501                 | <i>R</i> <sub>1</sub> = 0.0434, <i>wR</i> <sub>2</sub> = 0.1068                 |
| Final <i>R</i> indexes [all data]                   | <i>R</i> <sub>1</sub> = 0.0632, <i>wR</i> <sub>2</sub> = 0.1598                 | <i>R</i> <sub>1</sub> = 0.0661, <i>wR</i> <sub>2</sub> = 0.1292                 |
| Largest diff.peak/hole/e Å <sup>-3</sup>            | 0.55/-0.37                                                                      | 0.23/-0.22                                                                      |

---

| <b>Crystal</b>                              | <b>BDNTT (193K)</b>                                              | <b>Na<sub>2</sub>BT·5H<sub>2</sub>O</b>                                        |
|---------------------------------------------|------------------------------------------------------------------|--------------------------------------------------------------------------------|
| CCDC number                                 | 2336281                                                          | 2336291                                                                        |
| Empirical formula                           | C <sub>5</sub> H <sub>2</sub> N <sub>16</sub> O <sub>8</sub>     | C <sub>4</sub> H <sub>20</sub> N <sub>16</sub> Na <sub>4</sub> O <sub>10</sub> |
| Formula weight                              | 414.23                                                           | 544.32                                                                         |
| Temperature/K                               | 193.00                                                           | 193.00                                                                         |
| Crystal system                              | monoclinic                                                       | triclinic                                                                      |
| Space group                                 | C2/c                                                             | P-1                                                                            |
| <i>a</i> [Å]                                | 18.922(2)                                                        | 7.1884(8)                                                                      |
| <i>b</i> [Å]                                | 8.7592(9)                                                        | 7.5195(7)                                                                      |
| <i>c</i> [Å]                                | 8.6734(8)                                                        | 21.1688(19)                                                                    |
| $\alpha$ [°]                                | 90                                                               | 94.666(4)                                                                      |
| $\beta$ [°]                                 | 90.310(7)                                                        | 92.681(4)                                                                      |
| $\gamma$ [°]                                | 90                                                               | 112.464(4)                                                                     |
| Volume                                      | 1437.6(2)                                                        | 1050.14(18)                                                                    |
| Z                                           | 4                                                                | 2                                                                              |
| $\rho$ (g cm <sup>-3</sup> )                | 1.914                                                            | 1.721                                                                          |
| $\mu$ /mm <sup>-1</sup>                     | 0.176                                                            | 0.221                                                                          |
| F(000)                                      | 832.0                                                            | 560.0                                                                          |
| Crystal size (mm <sup>3</sup> )             | 0.12 × 0.11 × 0.1                                                | 0.13 × 0.12 × 0.11                                                             |
| Radiation                                   | MoK $\alpha$ ( $\lambda$ = 0.71073)                              | MoK $\alpha$ ( $\lambda$ = 0.71073)                                            |
| Theta range for data collection             | 4.306 to 54.928                                                  | 5.814 to 55.03                                                                 |
| Index ranges                                | -24 ≤ <i>h</i> ≤ 21, -11 ≤ <i>k</i> ≤ 11,<br>-11 ≤ <i>l</i> ≤ 11 | -9 ≤ <i>h</i> ≤ 9, -9 ≤ <i>k</i> ≤ 9,<br>-27 ≤ <i>l</i> ≤ 27                   |
| Reflections collected                       | 7805                                                             | 16269                                                                          |
| Independent reflections                     | 1648 [R <sub>int</sub> = 0.0626,<br>R <sub>sigma</sub> = 0.0486] | 4774 [R <sub>int</sub> = 0.0573,<br>R <sub>sigma</sub> = 0.0540]               |
| Data/restraints/<br>parameters              | 1648/69/136                                                      | 4774/1/384                                                                     |
| Goodness-of-fit on F <sup>2</sup>           | 1.041                                                            | 1.104                                                                          |
| Final R indices [I > 2σ(I)]                 | R <sub>1</sub> = 0.0424, wR <sub>2</sub> = 0.0977                | R <sub>1</sub> = 0.0427, wR <sub>2</sub> = 0.1075                              |
| Final R indexes [all data]                  | R <sub>1</sub> = 0.0627, wR <sub>2</sub> = 0.1166                | R <sub>1</sub> = 0.0492, wR <sub>2</sub> = 0.1135                              |
| Largest diff. peak/hole / e Å <sup>-3</sup> | 0.28/-0.26                                                       | 0.41/-0.38                                                                     |

| <b>Crystal</b>                                        | <b>NaHBT·3H<sub>2</sub>O</b>                                  | <b>K<sub>2</sub>BT</b>                                       |
|-------------------------------------------------------|---------------------------------------------------------------|--------------------------------------------------------------|
| CCDC number                                           | 2336298                                                       | 2336292                                                      |
| Empirical formula                                     | C <sub>2</sub> H <sub>7</sub> N <sub>8</sub> NaO <sub>3</sub> | C <sub>2</sub> K <sub>2</sub> N <sub>8</sub>                 |
| Formula weight                                        | 214.15                                                        | 214.30                                                       |
| Temperature/K                                         | 193.00                                                        | 193.00                                                       |
| Crystal system                                        | orthorhombic                                                  | monoclinic                                                   |
| Space group                                           | P2 <sub>1</sub> 2 <sub>1</sub> 2                              | C2/m                                                         |
| <i>a</i> [Å]                                          | 22.6230(16)                                                   | 10.4558(9)                                                   |
| <i>b</i> [Å]                                          | 32.769(2)                                                     | 8.9261(6)                                                    |
| <i>c</i> [Å]                                          | 3.5078(3)                                                     | 3.5674(3)                                                    |
| $\alpha$ [°]                                          | 90                                                            | 90                                                           |
| $\beta$ [°]                                           | 90                                                            | 93.355(3)                                                    |
| $\gamma$ [°]                                          | 90                                                            | 90                                                           |
| Volume                                                | 2600.5(3)                                                     | 332.37(5)                                                    |
| <i>Z</i>                                              | 12                                                            | 2                                                            |
| $\rho$ (g cm <sup>-3</sup> )                          | 1.641                                                         | 2.141                                                        |
| $\mu$ /mm <sup>-1</sup>                               | 1.671                                                         | 1.372                                                        |
| F(000)                                                | 1320.0                                                        | 212.0                                                        |
| Crystal size (mm <sup>3</sup> )                       | 0.13 × 0.12 × 0.11                                            | 0.12 × 0.09 × 0.08                                           |
| Radiation                                             | CuK $\alpha$ ( $\lambda$ = 1.54178)                           | MoK $\alpha$ ( $\lambda$ = 0.71073)                          |
| Theta range for data collection                       | 4.746 to 137.278                                              | 6.006 to 54.914                                              |
| Index ranges                                          | -23 ≤ <i>h</i> ≤ 27, -38 ≤ <i>k</i> ≤ 39, -3 ≤ <i>l</i> ≤ 4   | -13 ≤ <i>h</i> ≤ 13, -11 ≤ <i>k</i> ≤ 11, -4 ≤ <i>l</i> ≤ 4  |
| Reflections collected                                 | 13631                                                         | 7030                                                         |
| Independent reflections                               | 4706 [R <sub>int</sub> = 0.0917, R <sub>sigma</sub> = 0.0906] | 406 [R <sub>int</sub> = 0.0626, R <sub>sigma</sub> = 0.0184] |
| Data/restraints/parameters                            | 4706/3/397                                                    | 406/0/30                                                     |
| Goodness-of-fit on F <sup>2</sup>                     | 1.050                                                         | 1.149                                                        |
| Final R indices [ <i>I</i> > 2 $\sigma$ ( <i>I</i> )] | R <sub>1</sub> = 0.0714, wR <sub>2</sub> = 0.1852             | R <sub>1</sub> = 0.0258, wR <sub>2</sub> = 0.0654            |
| Final R indexes [all data]                            | R <sub>1</sub> = 0.1034, wR <sub>2</sub> = 0.2043             | R <sub>1</sub> = 0.0278, wR <sub>2</sub> = 0.0672            |
| Largest diff. peak/hole /e Å <sup>-3</sup>            | 0.43/-0.40                                                    | 0.42/-0.30                                                   |

| <b>Crystal</b>                                      | <b>H<sub>2</sub>BT</b>                                                 |
|-----------------------------------------------------|------------------------------------------------------------------------|
| CCDC number                                         | 2336252                                                                |
| Empirical formula                                   | C <sub>2</sub> H <sub>2</sub> N <sub>8</sub>                           |
| Formula weight                                      | 138.12                                                                 |
| Temperature/K                                       | 193.00                                                                 |
| Crystal system                                      | monoclinic                                                             |
| Space group                                         | P2 <sub>1</sub> /n                                                     |
| <i>a</i> [Å]                                        | 4.9542(5)                                                              |
| <i>b</i> [Å]                                        | 6.3958(6)                                                              |
| <i>c</i> [Å]                                        | 8.5251(8)                                                              |
| <i>α</i> [°]                                        | 90                                                                     |
| <i>β</i> [°]                                        | 98.967(7)                                                              |
| <i>γ</i> [°]                                        | 90                                                                     |
| Volume                                              | 266.83(4)                                                              |
| <i>Z</i>                                            | 2                                                                      |
| $\rho$ (g cm <sup>-3</sup> )                        | 1.719                                                                  |
| $\mu$ /mm <sup>-1</sup>                             | 1.173                                                                  |
| F(000)                                              | 140.0                                                                  |
| Crystal size (mm <sup>3</sup> )                     | 0.13 × 0.12 × 0.11                                                     |
| Radiation                                           | CuK $\alpha$ ( $\lambda$ = 1.54178)                                    |
| Theta range for data collection                     | 17.41 to 136.372                                                       |
| Index ranges                                        | -5 ≤ <i>h</i> ≤ 5, 0 ≤ <i>k</i> ≤ 7, 0 ≤ <i>l</i> ≤ 10                 |
| Reflections collected                               | 468                                                                    |
| Independent reflections                             | 468 [ <i>R</i> <sub>int</sub> = ?, <i>R</i> <sub>sigma</sub> = 0.0431] |
| Data/restraints/<br>parameters                      | 468 [ <i>R</i> <sub>int</sub> = ?, <i>R</i> <sub>sigma</sub> = 0.0431] |
| Goodness-of-fit on F <sup>2</sup>                   | 0.971                                                                  |
| Final <i>R</i> indices [ <i>I</i> > 2σ( <i>I</i> )] | <i>R</i> <sub>1</sub> = 0.0791, <i>wR</i> <sub>2</sub> = 0.1826        |
| Final <i>R</i> indexes [all data]                   | <i>R</i> <sub>1</sub> = 0.0887, <i>wR</i> <sub>2</sub> = 0.1871        |
| Largest diff. peak/hole / e Å <sup>-3</sup>         | 0.56/-0.41                                                             |

**Table S2.** Selected bond lengths [ $\text{\AA}$ ] and angles [ $^\circ$ ] for  $\text{Mg}_2\text{TT}\cdot 7\text{H}_2\text{O}$ 

| <b>parameter</b> | <b><math>\text{\AA}</math></b> | <b>parameter</b> | <b><math>\text{\AA}</math></b> |
|------------------|--------------------------------|------------------|--------------------------------|
| Mg1-O7           | 2.0274(19)                     | O2-H2B           | 0.86                           |
| Mg1-O4           | 2.061(2)                       | N1-N2            | 1.346(3)                       |
| Mg1-O1           | 2.053(2)                       | N1-C1            | 1.335(3)                       |
| Mg1-O3           | 2.122(2)                       | N2-N3            | 1.309(3)                       |
| Mg1-O5           | 2.068(2)                       | N3-N4            | 1.338(3)                       |
| Mg1-O6           | 2.0435(19)                     | N4-C1            | 1.317(3)                       |
| O1-H1A           | 0.85(5)                        | N5-C1            | 1.418(3)                       |
| O1-H1B           | 0.78(5)                        | N5-N6            | 1.336(3)                       |
| O3-H3A           | 0.85(4)                        | N5-N7            | 1.333(3)                       |
| O3-H3B           | 0.81(5)                        | N6-C2            | 1.335(3)                       |
| O4-H4B           | 0.86                           | N7-N8            | 1.315(3)                       |
| O4-H4A           | 0.86                           | N8-C2            | 1.350(3)                       |
| O5-H5A           | 0.86                           | N9-N10           | 1.342(3)                       |
| O5-H5B           | 0.86                           | N9-C3            | 1.333(3)                       |
| O6-H6B           | 0.86                           | N10-N11          | 1.314(3)                       |
| O6-H6A           | 0.86                           | N11-N12          | 1.350(3)                       |
| O7-H7A           | 0.86                           | N12-C3           | 1.333(3)                       |
| O7-H7B           | 0.86                           | C2-C3            | 1.442(3)                       |
| O2-H2A           | 0.86                           |                  |                                |

  

| <b>parameter</b> | <b><math>\text{\AA}</math></b> | <b>parameter</b> | <b><math>\text{\AA}</math></b> |
|------------------|--------------------------------|------------------|--------------------------------|
| O3-Mg1-O7        | 86.34(8)                       | H6A-O6-H6B       | 104                            |
| O4-Mg1-O5        | 86.74(8)                       | Mg1-O6-H6B       | 127                            |
| O4-Mg1-O6        | 90.37(8)                       | Mg1-O7-H7A       | 127                            |
| O4-Mg1-O7        | 88.60(8)                       | Mg1-O7-H7B       | 128                            |
| O5-Mg1-O6        | 92.85(8)                       | H7A-O7-H7B       | 104                            |
| O5-Mg1-O7        | 92.02(8)                       | H2A-O2-H2B       | 105                            |

|            |           |             |            |
|------------|-----------|-------------|------------|
| O6-Mg1-O7  | 174.96(9) | N2-N1-C1    | 102.84(18) |
| O3-Mg1-O5  | 174.91(9) | N1-N2-N3    | 109.78(19) |
| O1-Mg1-O3  | 92.19(9)  | N2-N3-N4    | 109.99(19) |
| O1-Mg1-O4  | 177.39(9) | N3-N4-C1    | 103.57(18) |
| O1-Mg1-O5  | 92.60(8)  | N6-N5-N7    | 114.10(19) |
| O1-Mg1-O6  | 92.19(8)  | N6-N5-C1    | 123.19(18) |
| O1-Mg1-O7  | 88.91(8)  | N7-N5-C1    | 122.70(19) |
| O3-Mg1-O4  | 88.41(8)  | N5-N6-C2    | 100.95(18) |
| O3-Mg1-O6  | 88.70(8)  | N5-N7-N8    | 105.70(18) |
| Mg1-O1-H1A | 122(3)    | N7-N8-C2    | 106.55(19) |
| Mg1-O1-H1B | 126(3)    | N10-N9-C3   | 104.22(19) |
| H1A-O1-H1B | 106(5)    | N9-N10-N11  | 109.74(18) |
| Mg1-O3-H3A | 117(3)    | N10-N11-N12 | 109.50(19) |
| Mg1-O3-H3B | 119(4)    | N11-N12-C3  | 103.96(18) |
| H3A-O3-H3B | 104(5)    | N1-C1-N4    | 113.8(2)   |
| Mg1-O4-H4A | 109       | N1-C1-N5    | 122.26(19) |
| Mg1-O4-H4B | 110       | N4-C1-N5    | 123.90(19) |
| H4A-O4-H4B | 104       | N8-C2-C3    | 124.2(2)   |
| Mg1-O5-H5B | 109       | N6-C2-N8    | 112.69(19) |
| H5A-O5-H5B | 104       | N6-C2-C3    | 123.15(19) |
| Mg1-O5-H5A | 110       | N9-C3-N12   | 112.6(2)   |
| Mg1-O6-H6A | 128       | N9-C3-C2    | 122.9(2)   |

**Table S3.** Torsion angles [°] of **Mg<sub>2</sub>TT·7 H<sub>2</sub>O**

| <b>parameter</b> | <b>Å</b>  | <b>parameter</b> | <b>Å</b>  |
|------------------|-----------|------------------|-----------|
| C1-N1-N2-N3      | -0.4(3)   | N7-N5-C1-N4      | -172.5(3) |
| N2-N1-C1-N4      | 0.2(3)    | N5-N6-C2-N8      | 0.0(3)    |
| N2-N1-C1-N5      | -178.4(2) | N5-N6-C2-C3      | -180.0(2) |
| N1-N2-N3-N4      | 0.4(3)    | N5-N7-N8-C2      | -0.7(3)   |

|              |           |                |           |
|--------------|-----------|----------------|-----------|
| N2-N3-N4-C1  | -0.3(3)   | N7-N8-C2-N6    | 0.5(3)    |
| N3-N4-C1-N1  | 0.0(3)    | N7-N8-C2-C3    | -179.6(3) |
| N3-N4-C1-N5  | 178.6(2)  | C3-N9-N10-N11  | 0.1(3)    |
| N7-N5-N6-C2  | -0.4(3)   | N10-N9-C3-N12  | -0.1(3)   |
| C1-N5-N6-C2  | -179.1(2) | N10-N9-C3-C2   | -179.3(3) |
| N6-N5-N7-N8  | 0.7(3)    | N9-N10-N11-N12 | 0.0(3)    |
| C1-N5-N7-N8  | 179.4(2)  | N10-N11-N12-C3 | 0.0(3)    |
| N6-N5-C1-N1  | -175.4(2) | N11-N12-C3-N9  | 0.1(3)    |
| N6-N5-C1-N4  | 6.1(4)    | N11-N12-C3-C2  | 179.3(3)  |
| N7-N5-C1-N1  | 6.0(4)    | N6-C2-C3-N9    | -5.5(4)   |
| N6-C2-C3-N12 | 175.3(3)  | N8-C2-C3-N12   | -4.7(5)   |
| N8-C2-C3-N9  | 174.5(3)  |                |           |

**Table S2.** Selected bond lengths [ $\text{\AA}$ ] and angles [ $^\circ$ ] for **BDNTT**

| <b>parameter</b> | <b><math>\text{\AA}</math></b> | <b>parameter</b> | <b><math>\text{\AA}</math></b> |
|------------------|--------------------------------|------------------|--------------------------------|
| O1-N10           | 1.196(3)                       | N5-N6            | 1.300(2)                       |
| O2-N10           | 1.205(2)                       | N5-C2            | 1.354(3)                       |
| O3-N9            | 1.198(3)                       | N6-N7            | 1.330(2)                       |
| O4-N9            | 1.216(2)                       | N7-N8            | 1.333(2)                       |
| N1-N2            | 1.30(2)                        | N7-C3            | 1.415(2)                       |
| N1-C1            | 1.34(3)                        | N8-C2            | 1.312(2)                       |
| N2-N3            | 1.36(2)                        | N9-C3            | 1.510(3)                       |
| N3-N4            | 1.3132                         | N10-C3           | 1.524(3)                       |
| N3-C2_a          | 1.403(18)                      | C1-C2            | 1.44(3)                        |
| N4-C1            | 1.3679                         | C3-H3            | 0.98                           |

  

| <b>parameter</b> | <b><math>\text{\AA}</math></b> | <b>parameter</b> | <b><math>\text{\AA}</math></b> |
|------------------|--------------------------------|------------------|--------------------------------|
| N2-N1-C1         | 107.2(15)                      | O2-N10-C3        | 118.51(17)                     |



|            |            |            |            |
|------------|------------|------------|------------|
| N1-N2-N3   | 105.0(13)  | N1-C1-N4   | 112.47     |
| N2-N3-N4   | 115        | N1-C1-C2   | 126(2)     |
| N2-N3-C2_a | 120.2(14)  | N4-C1-C2   | 121.19     |
| N4-N3-C2_a | 124.13     | N5-C2-N8   | 113.72(17) |
| N3-N4-C1   | 99.57      | N5-C2-C1   | 124.9(11)  |
| N6-N5-C2   | 106.14(16) | N3_a-C2-N5 | 121.9(7)   |
| N5-N6-N7   | 105.31(16) | N8-C2-C1   | 121.3(11)  |
| N6-N7-N8   | 114.76(15) | N3_a-C2-N8 | 124.3(7)   |
| N6-N7-C3   | 121.95(15) | N3_a-C2-C1 | 6.6(13)    |
| N8-N7-C3   | 123.28(15) | N7-C3-N9   | 112.83(17) |
| N7-N8-C2   | 100.06(15) | N7-C3-N10  | 108.20(14) |
| O3-N9-O4   | 128.2(2)   | N9-C3-N10  | 107.98(14) |
| O3-N9-C3   | 117.65(17) | N7-C3-H3   | 109        |
| O4-N9-C3   | 114.10(19) | N9-C3-H3   | 109        |
| O1-N10-O2  | 126.7(2)   | N10-C3-H3  | 109        |
| O1-N10-C3  | 114.78(19) |            |            |

**Table S3.** Torsion angles [°] of **BDNTT**

| <b>parameter</b> | <b>Å</b>   | <b>parameter</b> | <b>Å</b>    |
|------------------|------------|------------------|-------------|
| C1-N1-N2-N3      | -2(2)      | C3-N7-N8-C2      | -178.88(17) |
| N2-N1-C1-N4      | 6.76       | N6-N7-C3-N9      | -102.0(2)   |
| N2-N1-C1-C2      | -179.9(19) | N6-N7-C3-N10     | 138.60(17)  |
| N1-N2-N3-N4      | -4         | N8-N7-C3-N9      | 76.8(2)     |
| N1-N2-N3-C2_a    | -175.1(15) | N8-N7-C3-N10     | -42.6(2)    |
| N2-N3-N4-C1      | 7.52       | N7-N8-C2-N5      | 0.1(2)      |
| C2_a-N3-N4-C1    | 178.21     | N7-N8-C2-C1      | 175.7(12)   |
| N2-N3-C2_a-N5_a  | -167.6(12) | N7-N8-C2-N3_a    | -177.3(10)  |
| N2-N3-C2_a-N8_a  | 10(2)      | O3-N9-C3-N7      | -12.0(2)    |
| N2-N3-C2_a-C1_a  | 74(11)     | O3-N9-C3-N10     | 107.5(2)    |

|                 |            |               |            |
|-----------------|------------|---------------|------------|
| N4-N3-C2_a-N5_a | 22.17      | O4-N9-C3-N7   | 166.20(17) |
| N4-N3-C2_a-N8_a | -160.58    | O4-N9-C3-N10  | -74.3(2)   |
| N4-N3-C2_a-C1_a | -96.13     | O1-N10-C3-N7  | -60.3(2)   |
| N3-N4-C1-N1     | -8.5       | O1-N10-C3-N9  | 177.31(17) |
| N3-N4-C1-C2     | 177.8      | O2-N10-C3-N7  | 118.90(19) |
| C2-N5-N6-N7     | 0.2(2)     | O2-N10-C3-N9  | -3.5(2)    |
| N6-N5-C2-N8     | -0.2(2)    | N1-C1-C2-N5   | -176.2(16) |
| N6-N5-C2-C1     | -175.6(13) | N1-C1-C2-N8   | 9(3)       |
| N6-N5-C2-N3_a   | 177.3(10)  | N1-C1-C2-N3_a | -111(12)   |
| N5-N6-N7-N8     | -0.1(2)    | N4-C1-C2-N5   | -3.38      |
| N5-N6-N7-C3     | 178.79(17) | N4-C1-C2-N8   | -178.44    |
| N6-N7-N8-C2     | 0.0(2)     | N4-C1-C2-N3_a | 62.23      |

**Table S4.** Hydrogen bonds of **BDNTT**

| <b>D-H...A</b> | <b>d(D-H)/Å</b> | <b>d(H...A)/ Å</b> | <b>d(D...A)/ Å</b> | <b>&lt;(DHA)/°</b> |
|----------------|-----------------|--------------------|--------------------|--------------------|
| C3-H3..O1      | 0.98            | 2.59               | 3.479(3)           | 150                |
| C3-H3..O2      | 0.98            | 2.55               | 3.324(3)           | 136                |

**Table S5.** Selected bond lengths [Å] and angles [°] for **Na<sub>2</sub>BT•5H<sub>2</sub>O**

| <b>parameter</b> | <b>Å</b>   | <b>parameter</b> | <b>Å</b> |
|------------------|------------|------------------|----------|
| Na1-O1           | 2.3542(14) | O3-H3A           | 0.84(3)  |
| Na1-O2           | 2.3908(15) | O3-H3B           | 0.78(3)  |
| Na1-O3           | 2.4465(16) | O4-H4A           | 0.90(3)  |
| Na1-N14          | 2.4249(14) | O4-H4B           | 0.87(3)  |
| Na1-O1_a         | 2.3709(15) | O5-H5A           | 0.82(2)  |
| Na1-N9_a         | 2.4586(14) | O5-H5B           | 0.81(3)  |
| Na2-O2           | 2.3205(16) | O6-H6B           | 0.85(3)  |
| Na2-O3           | 2.4460(15) | O6-H6A           | 0.79(3)  |
| Na2-O4           | 2.6157(16) | O7-H7A           | 0.87     |

|           |            |          |            |
|-----------|------------|----------|------------|
| Na2-O5    | 2.4264(16) | O7-H7B   | 0.84(3)    |
| Na2-O6    | 2.3344(16) | O8-H8B   | 0.79(3)    |
| Na2-N10_a | 2.5568(15) | O8-H8A   | 0.85(3)    |
| Na3-O4    | 2.3613(16) | O9-H9B   | 0.84(3)    |
| Na3-O6    | 2.4944(14) | O9-H9A   | 0.80(3)    |
| Na3-O7    | 2.3164(15) | O10-H10A | 0.87(3)    |
| Na3-O8    | 2.4505(16) | O10-H10B | 0.81(3)    |
| Na3-O9    | 2.3730(16) | N1-N2    | 1.3467(18) |
| Na3-N2_b  | 2.6123(15) | N1-C1    | 1.3309(19) |
| Na4-O8    | 2.4829(16) | N2-N3    | 1.3101(19) |
| Na4-O9    | 2.3744(15) | N3-N4    | 1.3486(18) |
| Na4-O10   | 2.3456(16) | N4-C1    | 1.3358(19) |
| Na4-N5    | 2.4257(15) | N5-N8    | 1.3451(18) |
| Na4-O10_b | 2.3854(15) | N5-C2    | 1.331(2)   |
| Na4-N1_b  | 2.4190(15) | N6-C2    | 1.3360(19) |
| O1-H1A    | 0.83(2)    | N6-N7    | 1.3447(18) |
| O1-H1B    | 0.81(3)    | N7-N8    | 1.313(2)   |
| O2-H2A    | 0.84(3)    | N9-N10   | 1.3430(18) |
| O2-H2B    | 0.82(3)    | N9-C4    | 1.3333(19) |
| N10-N11   | 1.3090(19) | N14-N15  | 1.3410(18) |
| N11-N12   | 1.3459(18) | N14-C3   | 1.3406(19) |
| N12-C4    | 1.3381(19) | N15-N16  | 1.3149(19) |
| N13-C3    | 1.3352(19) | C1-C2    | 1.465(2)   |
| N13-N16   | 1.3482(18) | C3-C4    | 1.465(2)   |

---

| <b>parameter</b> | <b>Å</b>   | <b>parameter</b> | <b>Å</b>   |
|------------------|------------|------------------|------------|
| Na4_b-O10-H10A   | 119.4(17)  | Na2_a-N10-N9     | 120.62(9)  |
| Na4_b-O10-H10B   | 113.7(19)  | N10-N11-N12      | 109.84(12) |
| Na4_b-N1-C1      | 143.39(10) | N11-N12-C4       | 104.14(12) |

---

|               |            |             |            |
|---------------|------------|-------------|------------|
| N2-N1-C1      | 104.83(12) | N16-N13-C3  | 104.64(12) |
| Na4_b-N1-N2   | 110.50(9)  | Na1-N14-C3  | 142.12(11) |
| Na3_b-N2-N3   | 134.91(10) | Na1-N14-N15 | 111.08(9)  |
| N1-N2-N3      | 109.34(12) | N15-N14-C3  | 104.68(12) |
| Na3_b-N2-N1   | 114.81(9)  | N14-N15-N16 | 109.66(12) |
| N2-N3-N4      | 109.58(12) | N13-N16-N15 | 109.39(12) |
| N3-N4-C1      | 104.45(12) | N1-C1-N4    | 111.80(13) |
| Na4-N5-C2     | 147.05(11) | N1-C1-C2    | 124.21(13) |
| N8-N5-C2      | 104.76(12) | N4-C1-C2    | 124.00(13) |
| Na4-N5-N8     | 104.28(9)  | N5-C2-N6    | 111.97(13) |
| N7-N6-C2      | 104.30(12) | N5-C2-C1    | 123.79(13) |
| N6-N7-N8      | 109.76(12) | N6-C2-C1    | 124.23(13) |
| N5-N8-N7      | 109.21(12) | N13-C3-N14  | 111.63(13) |
| N10-N9-C4     | 104.63(12) | N13-C3-C4   | 123.89(13) |
| Na1_a-N9-C4   | 147.79(10) | N14-C3-C4   | 124.48(13) |
| Na1_a-N9-N10  | 105.31(9)  | N9-C4-N12   | 111.91(13) |
| N9-N10-N11    | 109.48(12) | N9-C4-C3    | 124.14(13) |
| Na2_a-N10-N11 | 129.67(10) | N12-C4-C3   | 123.95(13) |

**Table S6.** Torsion angles [°] of Na<sub>2</sub>BT•5H<sub>2</sub>O

| <b>parameter</b>  | <b>Å</b>    | <b>parameter</b>  | <b>Å</b>    |
|-------------------|-------------|-------------------|-------------|
| C1-N1-N2-N3       | -0.09(18)   | C4-N9-N10-Na2_a   | -174.99(10) |
| C1-N1-N2-Na3_b    | 170.47(10)  | N10-N9-C4-C3      | -179.67(15) |
| Na4_b-N1-N2-N3    | -170.33(11) | N10-N9-C4-N12     | -0.13(18)   |
| Na4_b-N1-N2-Na3_b | 0.22(13)    | Na1_a-N9-C4-N12   | -158.04(17) |
| N2-N1-C1-N4       | 0.0(2)      | N9-N10-N11-N12    | 0.18(19)    |
| Na4_b-N1-C1-N4    | 164.57(15)  | Na2_a-N10-N11-N12 | 174.55(11)  |
| N2-N1-C1-C2       | 179.44(15)  | N10-N11-N12-C4    | -0.25(18)   |
| Na4_b-N1-C1-C2    | -16.0(3)    | N11-N12-C4-C3     | 179.77(15)  |

|                    |             |                 |             |
|--------------------|-------------|-----------------|-------------|
| Na3_b-N2-N3-N4     | -167.72(12) | N11-N12-C4-N9   | 0.24(18)    |
| N1-N2-N3-N4        | 0.14(19)    | N16-N13-C3-C4   | -179.38(15) |
| N2-N3-N4-C1        | -0.13(19)   | N16-N13-C3-N14  | 0.35(18)    |
| N3-N4-C1-N1        | 0.08(19)    | C3-N13-N16-N15  | -0.39(18)   |
| N3-N4-C1-C2        | -179.36(15) | Na1-N14-N15-N16 | -167.34(11) |
| N8-N5-C2-C1        | -179.91(15) | C3-N14-N15-N16  | -0.08(18)   |
| Na4-N5-C2-N6       | -151.31(17) | N15-N14-C3-C4   | 179.56(15)  |
| Na4-N5-N8-N7       | 164.53(11)  | Na1-N14-C3-N13  | 160.24(14)  |
| C2-N5-N8-N7        | 0.26(18)    | N15-N14-C3-N13  | -0.18(18)   |
| N8-N5-C2-N6        | -0.20(19)   | Na1-N14-C3-C4   | -20.0(3)    |
| Na4-N5-C2-C1       | 29.0(3)     | N14-N15-N16-N13 | 0.30(19)    |
| N7-N6-C2-N5        | 0.07(19)    | N4-C1-C2-N5     | 175.38(16)  |
| N7-N6-C2-C1        | 179.77(15)  | N1-C1-C2-N5     | -4.0(3)     |
| C2-N6-N7-N8        | 0.10(19)    | N4-C1-C2-N6     | -4.3(3)     |
| N6-N7-N8-N5        | -0.23(19)   | N1-C1-C2-N6     | 176.33(16)  |
| Na1_a-N9-N10-N11   | 167.97(11)  | N14-C3-C4-N12   | 179.32(16)  |
| Na1_a-N9-N10-Na2_a | -6.99(13)   | N13-C3-C4-N9    | 178.51(16)  |
| Na1_a-N9-C4-C3     | 22.4(3)     | N13-C3-C4-N12   | -1.0(3)     |
| C4-N9-N10-N11      | -0.03(19)   | N14-C3-C4-N9    | -1.2(3)     |

**Table S8.** Selected bond lengths [Å] and angles [°] for **K<sub>2</sub>BT**

| parameter  | Å          | parameter    | Å          |
|------------|------------|--------------|------------|
| N1-N2      | 1.347(2)   | N2-N2_a      | 1.321(2)   |
| N1-C1      | 1.334(2)   | C1-C1_b      | 1.453(4)   |
| parameter  | Å          | parameter    | Å          |
| N2-N1-C1   | 104.10(15) | N1-C1-C1_b   | 123.64(12) |
| N1-N2-N2_a | 109.54(14) | N1_a-C1-C1_b | 123.64(12) |
| N1-C1-N1_a | 112.7(2)   |              |            |

**Table S9.** Torsion angles [°] of **K<sub>2</sub>BT**

| parameter     | Å         | parameter       | Å         |
|---------------|-----------|-----------------|-----------|
| C1-N1-N2-N2_a | 0.1(2)    | N2-N1-C1-C1_b   | 179.97(9) |
| N2-N1-C1-N1_a | -0.03(17) | N1-N2-N2_a-N1_a | -0.1(2)   |

**Table S11.** Selected bond lengths [Å] and angles [°] for **H<sub>2</sub>BT**

| parameter | Å        | parameter | Å        |
|-----------|----------|-----------|----------|
| N1-N2     | 1.356(6) | N4-C1     | 1.3297   |
| N1-C1     | 1.315(6) | N4-H4     | 0.97     |
| N2-N3     | 1.283(7) | C1-C1_a   | 1.443(6) |
| N3-N4     | 1.3709   |           |          |

| parameter | Å        | parameter  | Å        |
|-----------|----------|------------|----------|
| N2-N1-C1  | 108.5(4) | C1-N4-H4   | 154      |
| N1-N2-N3  | 106.7(4) | N4-C1-C1_a | 125.5    |
| N2-N3-N4  | 110.71   | N1-C1-N4   | 109.21   |
| N3-N4-C1  | 104.91   | N1-C1-C1_a | 125.3(4) |
| N3-N4-H4  | 101      |            |          |

**Table S12.** Torsion angles [°] of **H<sub>2</sub>BT**

| parameter     | Å        | parameter       | Å        |
|---------------|----------|-----------------|----------|
| C1-N1-N2-N3   | 0.3(5)   | N3-N4-C1-C1_a   | -177.86  |
| N2-N1-C1-C1_a | 178.0(4) | N1-C1-C1_a-N1_a | 180.0(5) |
| N2-N1-C1-N4   | -0.86    | N1-C1-C1_a-N4_a | 1.32     |
| N1-N2-N3-N4   | 0.3      | N4-C1-C1_a-N1_a | -1.32    |
| N2-N3-N4-C1   | -0.81    | N4-C1-C1_a-N4_a | -180     |
| N3-N4-C1-N1   | 1        |                 |          |

**Table S7.** Hydrogen bonds of **H<sub>2</sub>BT**

| <b>D-H···A</b> | <b>d(D-H)/Å</b> | <b>d(H···A)/ Å</b> | <b>d(D···A)/ Å</b> | <b>&lt;(DHA)/°</b> |
|----------------|-----------------|--------------------|--------------------|--------------------|
| N4-H4..N1      | 0.97            | 1.86               | 2.8162             | 168                |

**Table S13.** Selected bond lengths [Å] and angles [°] for **NaHBT•3H<sub>2</sub>O**

| <b>parameter</b> | <b>Å</b> | <b>parameter</b> | <b>Å</b>  |
|------------------|----------|------------------|-----------|
| Na1-O1           | 2.399(7) | N1-N2            | 1.300(10) |
| Na1-O2           | 2.411(7) | N1-N4            | 1.343(9)  |
| Na1-O3           | 2.348(7) | N2-N3            | 1.342(9)  |
| Na1-N2           | 2.675(7) | N3-C1            | 1.342(9)  |
| Na1-O1_b         | 2.407(7) | N4-C1            | 1.326(10) |
| Na1-O3_b         | 2.371(7) | N5-N6            | 1.333(9)  |
| Na2-O4_c         | 2.393(6) | N5-C2            | 1.343(10) |
| Na2-O6_d         | 2.412(6) | N6-N7            | 1.309(10) |
| Na2-O6           | 2.391(6) | N7-N8            | 1.327(9)  |
| Na2-O4           | 2.340(6) | N8-C2            | 1.344(9)  |
| Na2-O5           | 2.439(7) | N5-H5            | 0.88      |
| Na2-N15          | 2.704(7) | N9-N10           | 1.341(9)  |
| Na3-O7_f         | 2.455(7) | N9-C3            | 1.345(10) |
| Na3-O9_e         | 2.378(6) | N10-N11          | 1.304(10) |
| Na3-O7           | 2.384(7) | N11-N12          | 1.334(9)  |
| Na3-O8           | 2.409(7) | N12-C3           | 1.330(9)  |
| Na3-O9           | 2.384(6) | N13-C4           | 1.334(10) |
| Na3-N24          | 2.686(7) | N13-N14          | 1.360(9)  |
| N16-C4           | 1.334(9) | N14-N15          | 1.306(10) |
| N9-H9            | 0.88     | N15-N16          | 1.346(9)  |
| N17-C5           | 1.336(9) | N21-N24          | 1.357(9)  |
| N17-N18          | 1.351(9) | N22-C6           | 1.321(10) |

|         |           |         |           |
|---------|-----------|---------|-----------|
| N18-N19 | 1.311(10) | N22-N23 | 1.345(9)  |
| N19-N20 | 1.334(9)  | N23-N24 | 1.286(10) |
| N20-C5  | 1.328(10) | N20-H20 | 0.88      |
| N21-C6  | 1.330(9)  | C1-C2   | 1.435(9)  |
| C5-C6   | 1.472(9)  | C3-C4   | 1.444(9)  |

| <b>parameter</b> | <b>Å</b> | <b>parameter</b> | <b>Å</b> |
|------------------|----------|------------------|----------|
| N2-N1-N4         | 111.2(6) | N6-N5-H5         | 127      |
| N1-N2-N3         | 106.6(6) | N10-N9-C3        | 104.6(6) |
| Na1-N2-N1        | 106.6(5) | N9-N10-N11       | 109.4(6) |
| Na1-N2-N3        | 144.6(5) | N10-N11-N12      | 109.9(6) |
| N2-N3-C1         | 107.9(6) | N11-N12-C3       | 105.2(6) |
| N1-N4-C1         | 105.6(6) | N14-N13-C4       | 105.3(6) |
| N6-N5-C2         | 105.8(6) | N13-N14-N15      | 110.9(6) |
| N5-N6-N7         | 108.4(6) | Na2-N15-N16      | 145.3(5) |
| N6-N7-N8         | 111.0(6) | Na2-N15-N14      | 106.6(5) |
| N7-N8-C2         | 104.4(6) | N14-N15-N16      | 106.2(6) |
| C2-N5-H5         | 127      | N15-N16-C4       | 108.9(6) |
| C3-N9-H9         | 128      | N3-C1-N4         | 108.8(6) |
| N10-N9-H9        | 128      | N8-C2-C1         | 124.9(6) |
| N18-N17-C5       | 103.8(6) | N5-C2-C1         | 124.8(6) |
| N17-N18-N19      | 109.9(6) | N5-C2-N8         | 110.4(6) |
| N18-N19-N20      | 109.2(6) | N9-C3-C4         | 123.6(6) |
| N19-N20-C5       | 105.2(6) | N12-C3-C4        | 125.5(6) |
| N24-N21-C6       | 107.2(6) | N9-C3-N12        | 110.9(6) |
| N23-N22-C6       | 105.0(6) | N16-C4-C3        | 126.3(6) |
| N22-N23-N24      | 111.7(6) | N13-C4-N16       | 108.7(6) |
| Na3-N24-N21      | 145.3(5) | N13-C4-C3        | 125.1(6) |
| N21-N24-N23      | 106.5(6) | N17-C5-N20       | 112.0(6) |



|             |          |            |          |
|-------------|----------|------------|----------|
| Na3-N24-N23 | 106.2(5) | N17-C5-C6  | 124.2(6) |
| N19-N20-H20 | 127      | N20-C5-C6  | 123.8(6) |
| C5-N20-H20  | 127      | N21-C6-N22 | 109.7(6) |
| N3-C1-C2    | 124.2(6) | N21-C6-C5  | 124.3(6) |
| N4-C1-C2    | 127.0(6) | N22-C6-C5  | 126.0(6) |

**Table S14.** Torsion angles [°] of **NaHBT•3H<sub>2</sub>O**

| <b>parameter</b> | <b>Å</b>  | <b>parameter</b> | <b>Å</b>  |
|------------------|-----------|------------------|-----------|
| N2-N1-N4-C1      | -1.4(8)   | N15-N16-C4-C3    | -179.0(7) |
| N4-N1-N2-Na1     | -166.0(5) | N15-N16-C4-N13   | 1.1(8)    |
| N4-N1-N2-N3      | 1.5(8)    | N18-N17-C5-C6    | 179.6(7)  |
| Na1-N2-N3-C1     | 158.0(7)  | C5-N17-N18-N19   | -0.2(8)   |
| N1-N2-N3-C1      | -1.0(8)   | N18-N17-C5-N20   | 0.8(8)    |
| N2-N3-C1-N4      | 0.2(8)    | N17-N18-N19-N20  | -0.5(9)   |
| N2-N3-C1-C2      | -176.3(7) | N18-N19-N20-C5   | 1.0(8)    |
| N1-N4-C1-C2      | 177.1(7)  | N19-N20-C5-C6    | -179.9(7) |
| N1-N4-C1-N3      | 0.7(8)    | N19-N20-C5-N17   | -1.1(8)   |
| N6-N5-C2-N8      | 0.1(8)    | N24-N21-C6-N22   | 1.6(8)    |
| C2-N5-N6-N7      | 0.0(8)    | C6-N21-N24-N23   | -0.9(8)   |
| N6-N5-C2-C1      | 179.2(7)  | C6-N21-N24-Na3   | -160.8(7) |
| N5-N6-N7-N8      | -0.1(9)   | N24-N21-C6-C5    | 179.3(6)  |
| N6-N7-N8-C2      | 0.1(8)    | N23-N22-C6-N21   | -1.7(8)   |
| N7-N8-C2-N5      | -0.1(8)   | C6-N22-N23-N24   | 1.1(8)    |
| N7-N8-C2-C1      | -179.2(7) | N23-N22-C6-C5    | -179.3(7) |
| N10-N9-C3-C4     | 179.4(7)  | N22-N23-N24-N21  | -0.2(8)   |
| N10-N9-C3-N12    | -0.1(8)   | N22-N23-N24-Na3  | 168.1(5)  |
| C3-N9-N10-N11    | -0.7(8)   | N3-C1-C2-N5      | -12.0(12) |
| N9-N10-N11-N12   | 1.2(9)    | N4-C1-C2-N8      | -8.9(12)  |
| N10-N11-N12-C3   | -1.2(8)   | N3-C1-C2-N8      | 167.0(7)  |

|                 |           |               |           |
|-----------------|-----------|---------------|-----------|
| N11-N12-C3-C4   | -178.7(7) | N4-C1-C2-N5   | 172.1(7)  |
| N11-N12-C3-N9   | 0.8(8)    | N9-C3-C4-N13  | 171.3(7)  |
| C4-N13-N14-N15  | 0.4(8)    | N12-C3-C4-N16 | 170.9(7)  |
| N14-N13-C4-N16  | -0.9(8)   | N9-C3-C4-N16  | -8.6(12)  |
| N14-N13-C4-C3   | 179.2(7)  | N12-C3-C4-N13 | -9.3(12)  |
| N13-N14-N15-N16 | 0.3(8)    | N17-C5-C6-N21 | -165.8(7) |
| N13-N14-N15-Na2 | -168.2(5) | N17-C5-C6-N22 | 11.5(12)  |
| Na2-N15-N16-C4  | 159.6(7)  | N20-C5-C6-N21 | 12.8(11)  |
| N14-N15-N16-C4  | -0.9(8)   | N20-C5-C6-N22 | -169.9(7) |

**Table S15.** Hydrogen bonds of **NaHBT•3H<sub>2</sub>O**

| <b>D-H...A</b> | <b>d(D-H)/Å</b> | <b>d(H...A)/ Å</b> | <b>d(D...A)/ Å</b> | <b>&lt;(DHA)/°</b> |
|----------------|-----------------|--------------------|--------------------|--------------------|
| N5--H5..N16    | 0.88            | 1.97               | 2.733(10)          | 144                |
| N9--H9..N3     | 0.88            | 2                  | 2.771(9)           | 146                |
| N20--H20..N21  | 0.88            | 1.97               | 2.741(9)           | 146                |

Theoretical calculations were performed by using the Gaussian 09 (Revision E.01) suite of programs.<sup>[3]</sup> The elementary geometric optimization and the frequency analysis were performed at the level of the Becke three parameter, Lee-Yan-Parr (B3LYP) functional with the 6-311+G\*\* basis set.<sup>[4]</sup> All of the optimized structures were characterized to be local energy minima on the potential surface without any imaginary frequencies. Atomization energies were calculated by the CBS-4M. All the optimized structures were characterized to be true local energy minima on the potential-energy surface without imaginary frequencies.

The predictions of heat of formation (HOF) adopt the hybrid DFT-B3LYP methods with 6-311+G\*\* basis set via designed isodesmic reactions. The isodesmic reaction processes, i.e., the number of each kind of formal bond is conserved, are used with application of the bond separation reaction (BSR) rules. The molecule is broken down into a set of two heavy atom molecules containing the same component bonds. The isodesmic reactions used to derive the HOF of the title compounds are in Scheme S1. The change of enthalpy for the reactions at 298 K can be expressed as

$$\Delta H_{298} = \sum \Delta_f H_P - \sum \Delta_f H_R \quad (1)$$

Where  $\sum \Delta_f H_P$  and  $\sum \Delta_f H_R$  are the HOF of reactants and products at 298 K, respectively, and  $\Delta H_{298}$  can be calculated using the following expression:

$$\Delta H_{298} = \Delta E_{298} + \Delta(PV) = \Delta E_0 + \Delta ZPE + \Delta H_T + \Delta nRT \quad (2)$$

Where  $\Delta E_0$  is the change in total energy between the products and the reactants at 0 K;  $\Delta ZPE$  is the difference between the zero-point energies (ZPE) of the products and the reactants at 0 K;  $\Delta H_T$  is thermal correction from 0 to 298 K. The  $\Delta(PV)$  value in eq (2) is the PV work term. It equals  $\Delta(nRT)$  for the reactions of ideal gas. For the isodesmic reaction,  $\Delta n = 0$ , so  $\Delta(PV) = 0$ . On the left side of Eq. (1), apart from target compound, all the others are called reference compounds. The HOF of reference compounds is available from the experiments.

For energetic salts, the solid-phase heats of formation are calculated based on a Born-Haber energy cycle. The heat of formation of a salt can be simplified by the formula given in Equation (1):

$$\Delta H_f^0(\text{salt}, 298 \text{ K}) = \Delta H_f^0(\text{cation}, 298 \text{ K}) + \Delta H_f^0(\text{anion}, 298 \text{ K}) - \Delta H_L \quad (1)$$

Where  $\Delta H_L$  is the lattice energy of the salts, which could be predicted by using the formula suggested by Jenkins et al. [5] [Eq. (2)]

$$\Delta H_L = U_{\text{POT}} + [p(n_M/2 - 2) + q(n_X/2 - 2)]RT \quad (2)$$

where  $n_M$  and  $n_X$  depend on the nature of the ions,  $Mp^+$  and  $Xq^-$ , and are equal to 3 for monatomic ions, 5 for linear polyatomic ions, and 6 for nonlinear polyatomic ions. The equation for lattice potential energy  $U_{\text{POT}}$  [Eq. (3)] has the form:

$$U_{\text{POT}} (\text{kJ} \cdot \text{mol}^{-1}) = \gamma (\rho_m/M_m)^{1/3} + \delta \quad (3)$$

Where  $\rho_m/\text{g cm}^{-3}$  is the density,  $M_m$  is the chemical formula mass of the ionic material, and values for the coefficients  $\gamma/\text{kJ mol}^{-1} \text{ cm}$  and  $\delta/\text{kJ mol}^{-1}$  are taken from the literature.[6,7]

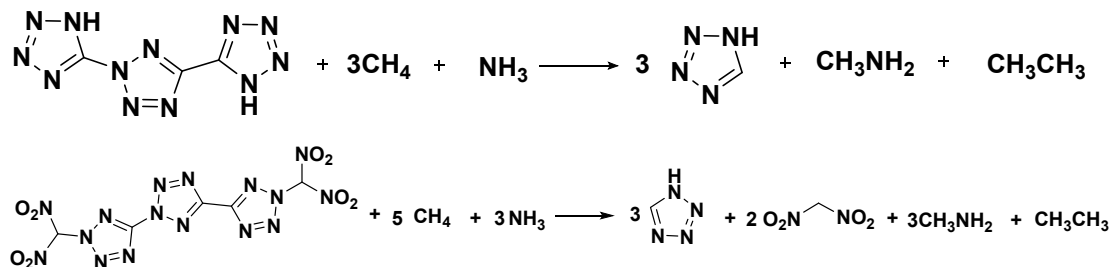

**Scheme S1.** Isodesmic reactions of neutral compounds.

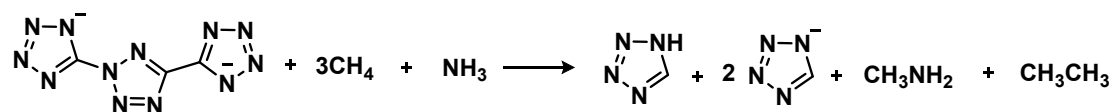

**Scheme S2.** Isodesmic reactions of ionic compounds.

**Table S19.** Ab initio computational values of small molecules used in isodesmic and tautomeric reactions.

| Compound                                                                            | $E_0^a$  | ZPE <sup>b</sup> | $H_T^c$  | HOF <sup>d</sup>   |
|-------------------------------------------------------------------------------------|----------|------------------|----------|--------------------|
| CH <sub>4</sub>                                                                     | -40.53   | 112.26           | 10.04    | -74.6 <sup>e</sup> |
| NH <sub>3</sub>                                                                     | -56.58   | 86.27            | 10.05    | -45.9 <sup>e</sup> |
| CH <sub>3</sub> NH <sub>2</sub>                                                     | -95.89   | 160.78           | 11.64    | -22.5 <sup>e</sup> |
| CH <sub>3</sub> CH <sub>3</sub>                                                     | -79.86   | 187.31           | 11.79    | -84 <sup>e</sup>   |
|    | -258.32  | 117.69           | 11.84    | 334.3              |
|    | -257.79  | 84.91            | 11.26    | 175.75             |
|   | -771.407 | 189.3662         | 26.57794 | 999.666            |
|  | -772.544 | 255.31           | 30.62    | 1140.313           |
|  | -1669.33 | 417.9107         | 64.79997 | 1260.852           |

<sup>a</sup>Total energy calculated by B3LYP/6-311+G\*\*method (a.u);

<sup>b</sup>Zero-point correction (kJ mol<sup>-1</sup>);

<sup>c</sup>Thermal correction to enthalpy (kJ mol<sup>-1</sup>);

<sup>d</sup>Heat of formation (kJ mol<sup>-1</sup>);

<sup>e</sup>Data are from Ref. [D. R. Lide, ed., CRC Handbook of Chemistry and Physics, 88th Edition (Internet Version 2008), CRC Press/Taylor and Francis, Boca Raton, FL.]

### 3. References

- [1] L.H. Finger, F.G. Schröder, J. Sundermeyer, Synthesis and characterisation of 5, 5'-bistetrazolate salts with alkali metal,

- ammonium and imidazolium cations, *Z. Anorg. Allg. Chem.*, 2013, **639**, 1140-1152.
- [2] Z. Noorpoor, S. Tavangar, Preparation and characterization of Cu based on 5,5'-bistetrazole as a recyclable metal-organic framework and application in synthesis of diaryl ether by the Ullmann coupling reaction, *J. Coord. Chem.*, 2021, **74**, 1651-1662.
- [3] Becke, A. D. Density-functional thermochemistry. III. The role of exact exchange. *J. Chem. Phys.* 1993,98, 5648-5652.
- [4] Hariharan, P. C.; Pople, J. A.; Influence of Polarization Functions On MO Hydrogenation Energies. *Theor. Chim. Acta.* **1973**, 28, 213-222.
- [5] Ochterski, J. W.; Petersson, G. A.; A Complete Basis Set Model Chemistry. V. Extensions to Six or More Heavy Atoms. *Montgomery JA, J. Chem. Phys.* **1996**, 104, 2598-2619.
- [6] Jenkins, H. D.; Tudeal, D.; Glasser, L. Lattice Potential Energy Estimation for Complex Ionic Salts from Density Measurements. *Inorg. Chem.* **2002**, 41, 2364-2367.
- [7] Jenkins, H. D.; Roobottom, H. K.; Passmore J, Glasser L. Relationships among Ionic Lattice Energies, Molecular (Formula Unit) Volumes, And Thermochemical Radii. *Inorg. Chem.* **1999**, 38, 3609-3620.

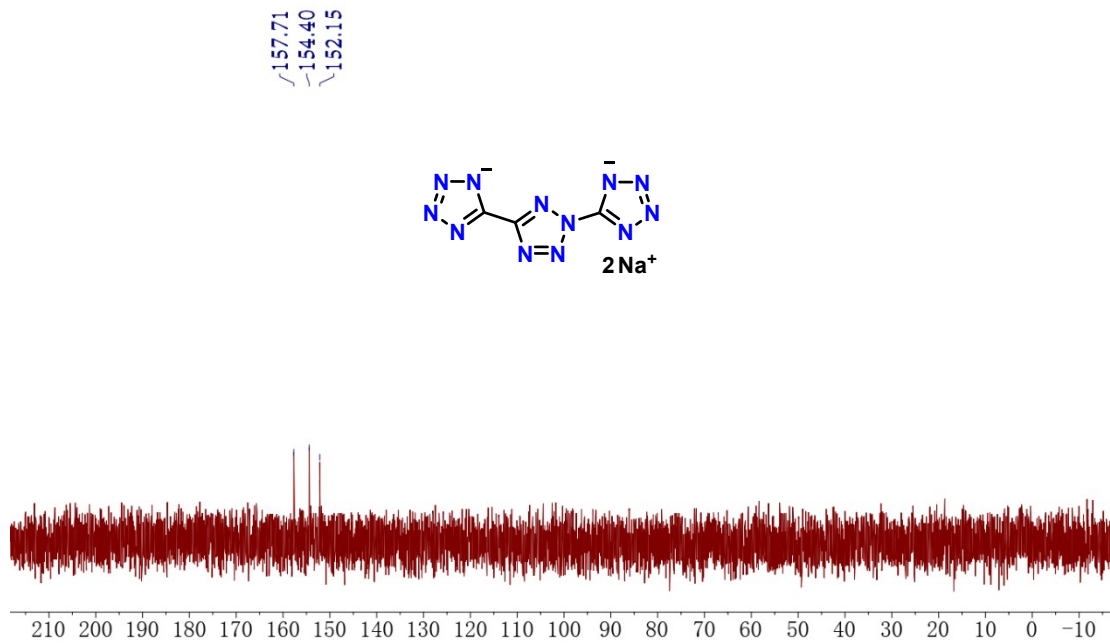

#### 4.<sup>1</sup>H & <sup>13</sup>C NMR Spectra of Na<sub>2</sub>TT, H<sub>2</sub>TT, BDNTT and compound 1

Figure S3 <sup>13</sup>C NMR spectra (300 MHz) of Na<sub>2</sub>TT in [D<sub>6</sub>] H<sub>2</sub>O at 25 °C.

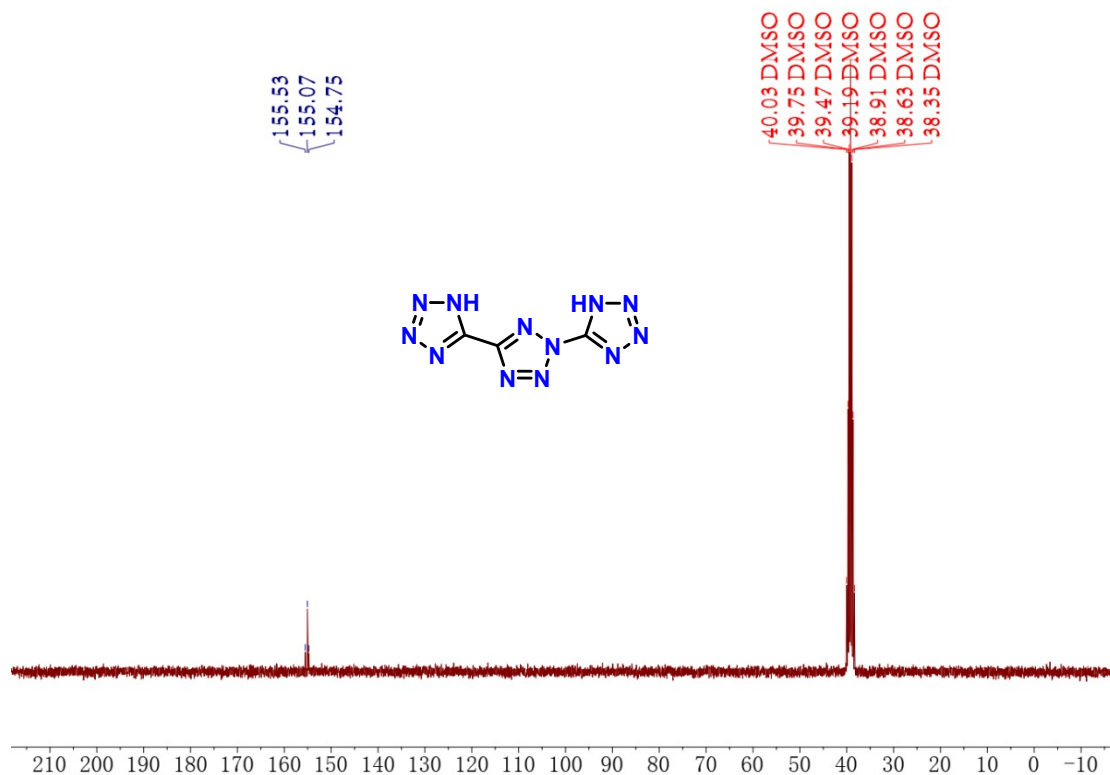

Figure S4 <sup>13</sup>C NMR spectra (300 MHz) of H<sub>2</sub>TT in [D<sub>6</sub>] DMSO at 25 °C.

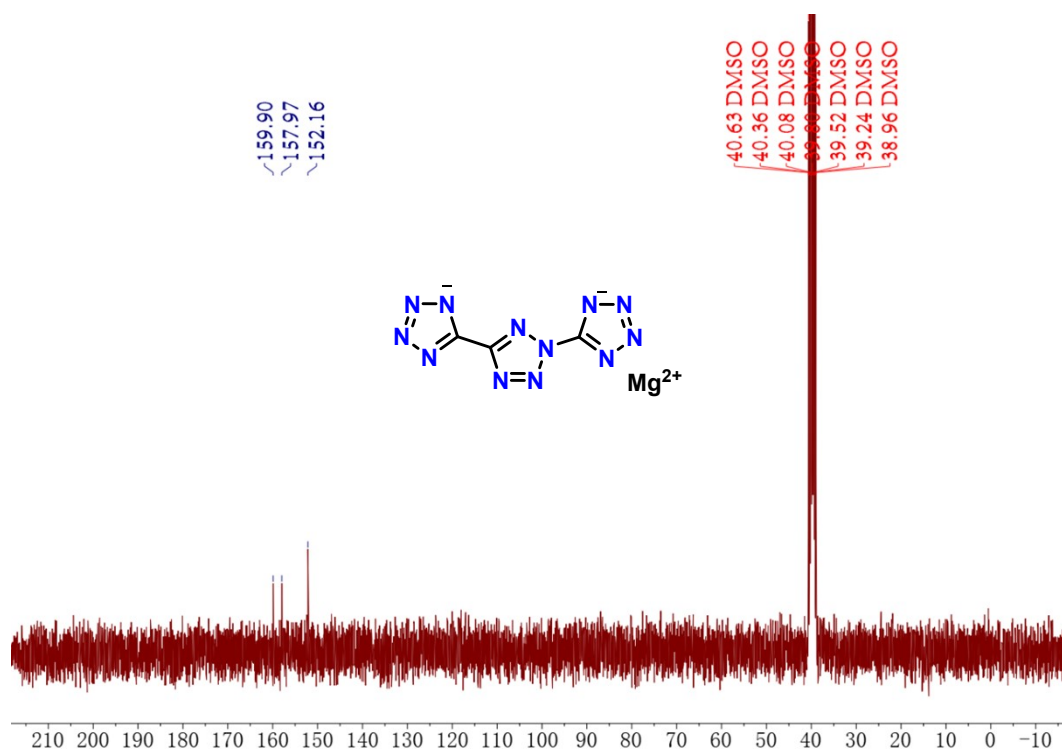

Figure S5 <sup>13</sup>C NMR spectra (300 MHz) of MgTT in [D<sub>6</sub>] DMSO at 25 °C.

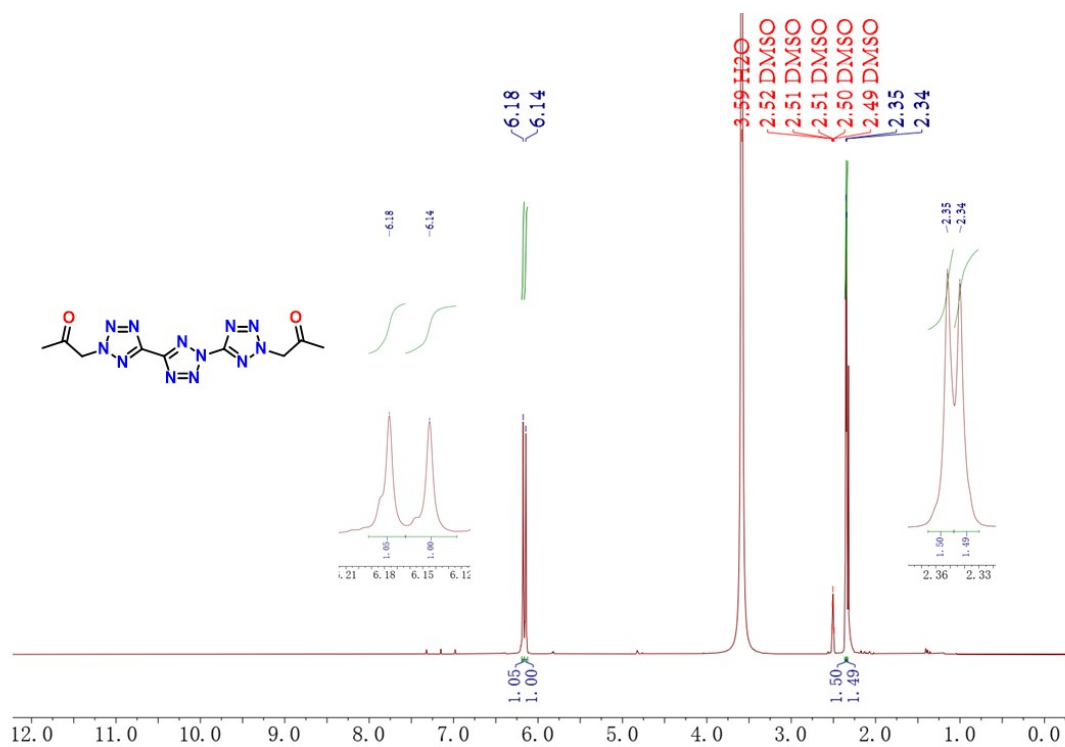

Figure S6 <sup>1</sup>H NMR spectra (300 MHz) of **1** in [D<sub>6</sub>] DMSO at 25 °C.

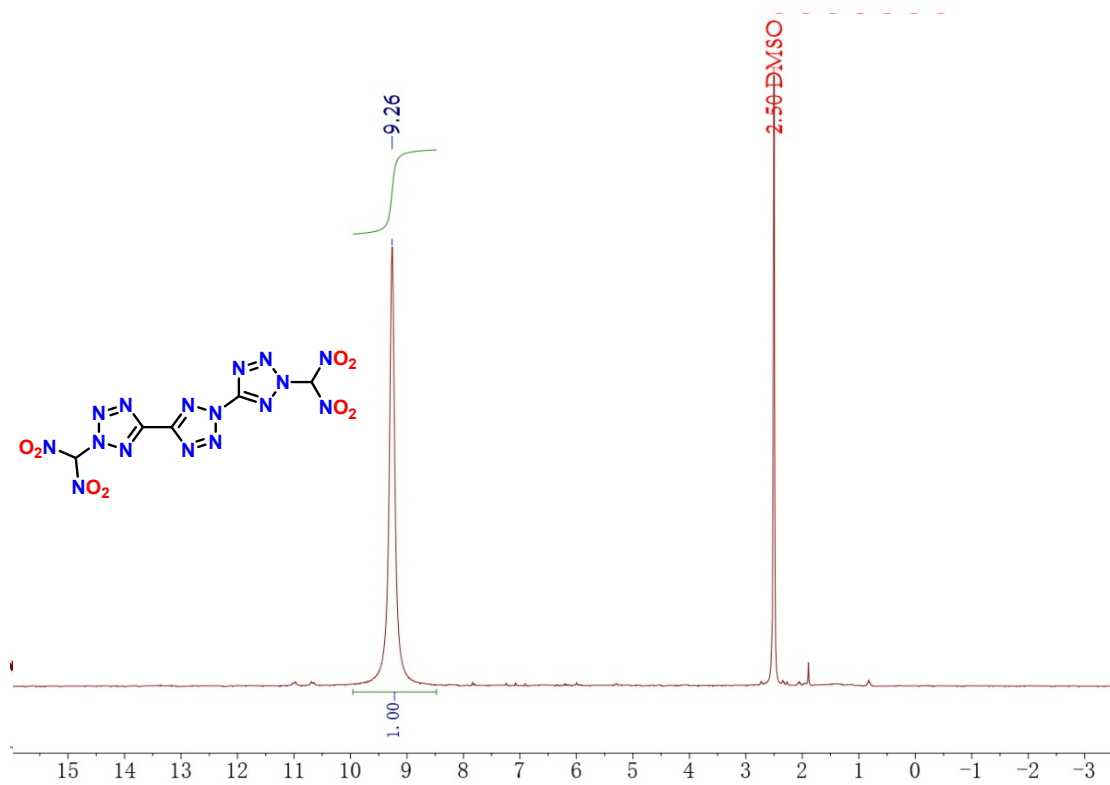

Figure S7 <sup>13</sup>C NMR spectra (75 MHz) of **1** in [D<sub>6</sub>] DMSO at 25 °C.

Figure S8 <sup>1</sup>H NMR spectra (300 MHz) of **BDNTT** in [D<sub>6</sub>] DMSO at 25 °C.



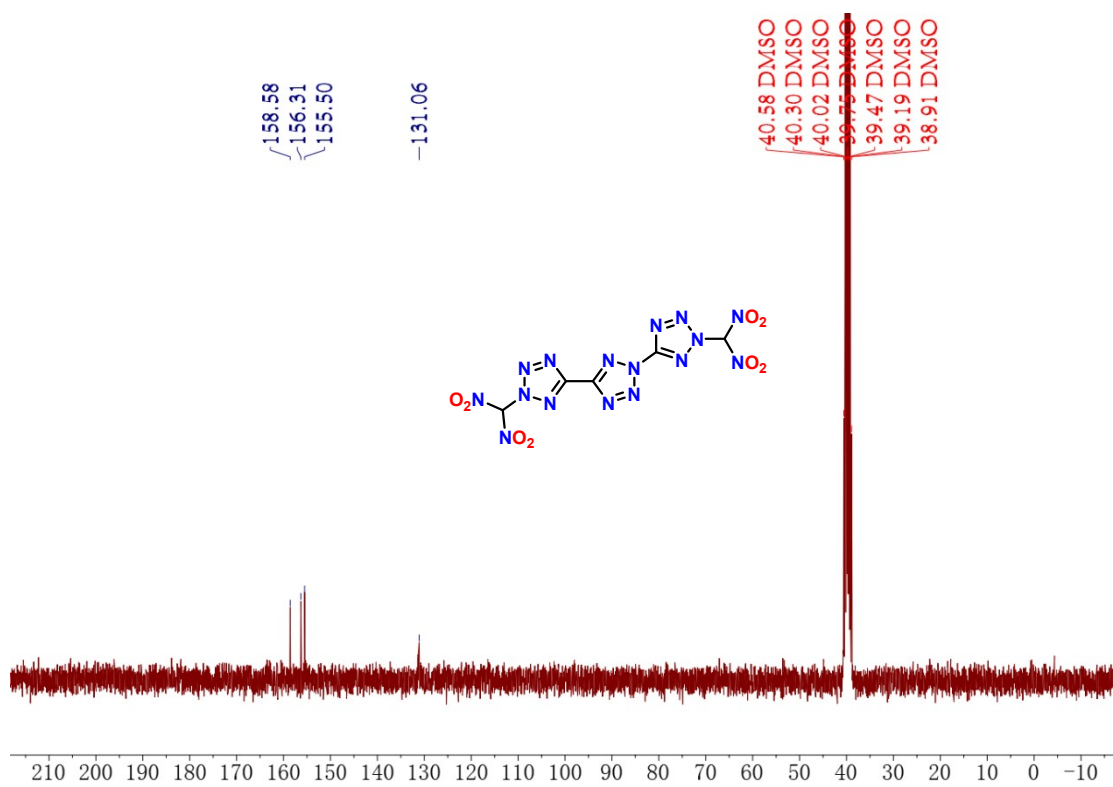

**Figure S9** <sup>13</sup>C NMR spectra (75 MHz) of **BDNTT** in [D<sub>6</sub>] DMSO at 25 °C.
